# Supplementary material for: Composition, concentration, and oxidant reactivity of sesquiterpenes in the southeastern U.S.
Source: Royal Society of Chemistry journal article supplement (doi:10.1039/d2ea00059h), 2022-01-01
Supplement: d2ea00059h1.xlsx [file d2ea00059h1.xlsx]

## Sheet: Tower Time Series
		ng m-3
TIME (D/M/Y HH:MM:SS)		alpha copaene	alpha cedrene	beta caryophyllene	beta cedrene	bergamotene	thujopsene	humulene	alloaromadendrene	gamma muurolene	beta selinene	alpha muurolene	gamma cadinene	delta cadinene	cuparene	calammanene	alpha cadinene	azulene	7 epi selinene
2019-08-07 20:14:00		0.689495	0.586451	0	0.845386	0.714073	0.741632	0	0	0.826212	1.30267	1.12133	0.708562	0.770397	1.43371	3.90777	0.724938	1.03754	1.11808
2019-08-07 22:14:00		0.555264	0.772037	1.0618	1.05225		1.43372	0	0	0.581436	0.912672	0.766253	0	0.576493	1.40333	2.19306	0.700343	0	0.689347
2019-08-08 00:15:00		0.712663	1.02081	1.35597	1.11165	0.559069	0.5821	0	0	0.700368	0.718483	0.842941	0.608728	0.693256	1.2372	3.22138	0	0.70951	0.989244
2019-08-08 14:43:00		0	0.58445	0.637895	0.884641	0.931332	1.55721	0	0.575445	0.629698	0.743359	0.713516	0.627166	0.601396	1.12984	1.46232	0.833058	2.3861	0.697444
2019-08-08 16:44:00		0.652731	0.746294	0.617105	1.27985		0.715847	0.769982	0.624396	0.676819	0.826393	0.725508	0.552232	0.638916	1.1088	1.73181	0.677553	1.31299	0.847443
2019-08-08 18:45:00		0.808191	0.768563	0.915778	1.17804	0.622931	0.653616	1.23706	0	0.71527	0.679792	0.778165	0.58083	0.605181	0.864198	1.6103	0.637798	0.603704	0.821417
2019-08-08 21:46:00		1.96873	1.48101	1.57661	1.21353	0.78915	0.868751	1.33716	0.876537	1.04472	0.565991	1.19363	0.730996	0.705412	1.43829	4.1225	0.624119	1.48583	1.11125
2019-08-08 23:47:00		2.49983	2.86175	3.20602	2.62589	0.735741	1.62069	2.42992	1.12933	1.22694	1.66919	0.737907	0.833812	0.951344	2.07316	5.26489	0.718675	2.86803	1.39251
2019-08-09 01:48:00		1.23131	2.35332	1.69564	1.83034	0.775229	0.838358	1.26952	0.869196	0.887381	1.42074	1.01426	0.675412	0.696425	2.02086	4.01815	0.637336	1.40686	1.55276
2019-08-09 14:44:00		1.04756	0.626888	0.701657	0.824526	0	1.19899	0	0	0.705842	1.41614	0.72717	0.575492	0.609905	1.02476	1.9437	1.22396	0	1.12855
2019-08-09 16:45:00		0	0	0.736914	0.907237	0.664723	1.35908	0	0	0.654059	1.13407	0.781103	0.602074	0.595816	1.16582	1.78721	0.737808	0	0.674471
2019-08-09 18:46:00		0	0.655795	0.652922	0.940118	0.566513	1.11204	0	0	0.640852	1.06423	0.756485	0.604091	0.608793	1.0527	1.74622	0.781014	0	0.665131
2019-08-09 20:47:00		0	0.873454	0.753237	1.0395	0	0.960473	0	0	0.699884	0.959074	0.785249	0.585796	0.63602	1.13051	2.20812	0.692402	4.15014	1.20124
2019-08-09 22:48:00		1.16031	6.33797	2.46934	2.32359	0.773341	0.838754	1.1143	0.834306	0.925038	1.1084	1.0231	0.702097	0.731358	3.14272	4.18484	0.601501	1.45056	0.542105
2019-08-10 01:49:00		0.688448	1.39354	0.754564	1.05902	0.794809	0.625766	0.862964	0.684609	0.648982	0.553952	0.734751	0.589263	0.577328	1.64059	2.542	0.599476	0.948459	0.736493
2019-08-10 03:50:00		0.730926	1.98086	2.34876	0.78014	0.742143	0.579223	1.02715	0.652716	0.650186	0.897512	0.81072	0.587531	0.62761	1.81838	2.72195	0.593409	0.944278	0.641919
2019-08-10 05:50:00		0.615745	0.933032	1.09326	1.09787	0	0.853176	0.780235	0.676818	0.592764	0.555239	0.713914	0.5535	0.588314	1.31392	1.82521	0.596552	0.850146	0.657254
2019-08-10 07:51:00		1.51226	2.0047	2.23995	1.06431	0.772656	0.863791	1.41514	0.855022	0.853997	0.781118	1.02081	0.726347	0.876233	1.67525	3.11333	0.721926	1.62874	1.44981
2019-08-10 09:52:00		0.698084	0.92486	1.19148	0.865944	0.573214	0.810761	0.753469	0.778005	0.642997	6.01173	0.710721	0.584792	0.611631	1.21196	1.8027	0.617963	0.808824	0.749519
2019-08-10 12:53:00		0.565843	0.614841	0.765153	0.825193	0	1.06913	0	0	0.595897	0.782621	0.676526	0.69679	0	0.916634	1.19242	0.786928	0.633475	0.882063
2019-08-10 14:54:00		0	0.581399	0.758538	0.920546	0	1.14201	0	0	0.578328	0.690245	0.673279	0.549687	0	0.969683	1.09207	0.718827	0	0.64535
2019-08-10 16:55:00		0.565778	0.714643	1.02257	1.05663	0.632797	0.658734	0.917241	0.670061	0.744484	1.1646	0.867095	0.626358	0.71321	1.02859	2.38499	0.654467	1.08945	0.788212
2019-08-10 18:56:00		0.604335	0.731213	0.720892	0.852656	0.545042	0.922043	0	0.6424	0.64526	0.794016	0.689421	0.687203	0.562081	0.920874	1.49391	0.701316	1.07048	1.04159
2019-08-10 20:57:00		1.17068	1.38879	0.946614	1.28063	0.663088	0.875834	1.01075	0.760374	0.795712	0.992104	0	0.644441	0.690342	1.2999	3.15798	0.625702	1.13395	0.936653
2019-08-10 23:58:00		2.001	4.37014	3.27022	2.39495	0.606551	1.08827	1.42352	0.916763	1.10203	0.910881	1.23102	0.817786	0.90846	2.51259	4.58064	0.695582	1.68182	1.18393
2019-08-11 01:59:00		1.45202	2.92592	3.5927	2.21269	0.610845	0.963136	1.31452	0.869529	0.860883	2.37868	1.00864	0.718954	0.832918	2.21157	3.64785	0.710129	1.53563	1.12064
2019-08-11 03:59:00		2.58326	3.99434	2.66027	2.9372	0.903466	1.61273	1.04475	1.19624	1.23311	37.2502	1.62105	1.05411	1.91947	2.55358	5.40106	0.870935	2.22872	2.10353
2019-08-11 09:02:00		1.47268	2.43663	3.75278	2.18126	0.61247	1.05483	1.35874	0.856789	0.946036	0.871028	1.05256	0.753398	0.906234	2.07167	3.73866	0.684487	1.59315	1.11003
2019-08-11 17:03:00		0	0	0.549646	0.600426	0	0.952136	1.03848	0	0.616339	0.751902	0.597667	0.557445	0.554265	0.860366	0.62702	0.628354	0	0.762042
2019-08-11 19:04:00		0	0.54867	0.890215	1.10317	0	0.852252	1.00443	0.596199	0.571605	0.715401	0.65181	0	0.557826	0.887709	0.723418	0.575567	0	0.724827
2019-08-11 21:05:00		0.560573	0.780188	0.773239	0.961917	0.562642	0.872971	0.872186	0.739381	0.761256	0.890268	0.842064	0.628969	0.66058	1.04658	2.34904	0.695421	0.777225	0.674694
2019-08-11 23:06:00		0.953114	1.59103	0.799126	1.31663	0.557997	0.795641	0.891402	0.709896	0.732695	0.542105	0.810626	0.592048	0.627589	1.37829	2.53307	0	0.972146	0.805043
2019-08-12 01:06:00		2.09016	6.44308	3.63318	3.25825	1.71825	1.0947	1.53734	0.935388	1.12815	1.04745	1.18149	0.810649	0.850517	2.61685	4.67669	0.681286	1.81405	1.11808
2019-08-12 04:08:00		1.61566	5.13634	6.44323	2.94857	1.15618	1.32798	1.46752	0.877887	0.991935	0.926678	1.16012	0.786576	0.892401	2.75505	4.25914	0.654664	1.72364	1.15222
2019-08-12 06:08:00		2.72201	6.03839	4.55973	3.57879	0.729582	2.02109	1.0882	1.13289	1.26186	0.63718	1.44768	0.993364	1.50033	3.02302	5.21236	0.856766	2.4525	1.88616
2019-08-12 08:09:00		2.90394	5.30316	4.89372	5.14385	1.13149	1.93141	1.98552	1.43895	1.40677	1.21388	1.82163	1.18849	2.44114	2.87183	5.79078	1.03116	2.79637	0.985974
2019-08-12 10:10:00		0.695419	1.01176	0.874219	0.938649	0.743289	0.664756	0.542105	0.693583	0.901947	1.46765	1.24841	0.80572	1.32402	2.22506	3.84848	0.772631	0.608108	0.585416
2019-08-12 12:11:00		0.585737	0.784138	0.644809	0.836912	0	0.834372	0.854327	0.665557	0.591551	0.849066	0.744537	0.572136	0.581951	1.13942	1.75265	0	0.692923	0.628937
2019-08-12 16:13:00		0	0.582606	0.567433	0.561785	0.542105	0.889783	0.859393	0.652709	0	20.4217	0.894077	0	0.583903	0.877644	2.33717	1.13669	0	1.05189
2019-08-12 18:13:00		0.568946	0.542105	0.817705	0	0.552753	0.893827	1.34512	0.706735	0	14.9326	0.695323	0.608497	0.587958	0.910716	2.3063	1.58896	0	1.16492
2019-08-14 14:13:00		0.575831	0.765278	1.30607	0.84249	0	0.858824	0.979846	0	0	0	0.647492	0	0	4.11726	0	1.01467	1.01172	0.604019
2019-08-14 16:14:00		0.681926	0.691483	0.972684	0.795799	0.565246	0.678723	0.618358	0.753738	0.652646	1.09619	1.17761	0.570389	0.577666	0.958877	1.60947	0.662622	0.645929	0.565696
2019-08-14 18:15:00		0.669317	0.569438	1.0689	1.17462	0.598623	0.722403	0.683451	0.786253	0.651583	0.632684	0.794448	0.581416	0.590625	0.988904	1.45716	0.647592	0.699589	2.02226
2019-08-14 20:15:00		1.15585	1.65757	2.0712	1.04811	0.659467	0.711003	0.847006	0.86978	0.926353	0	1.09508	0.737409	0.701927	1.32818	3.15349	0.666864	0.926506	0.952105
2019-08-14 22:16:00		1.18912	1.32494	1.16292	0.945333	0.693363	0.684662	0.933836	0.839301	0.955465	2.64063	1.0492	0.710377	0.735904	1.31563	3.85105	0.627239	1.0528	0.585073
2019-08-15 01:18:00		2.17461	2.0611	2.43116	1.54864	1.0009	1.58164	2.22304	1.28847	1.22164	0.900595	1.5855	0.919061	1.34297	1.95704	5.88268	0.750524	2.63418	1.80256
2019-08-15 03:18:00		3.31976	2.63097	3.71373	3.02245	1.65323	1.6618	2.34533	1.93017	1.78329	2.22113	2.56216	1.57105	3.40301	2.39586	8.80071	1.26834	2.7702	4.13915
2019-08-15 05:19:00		1.73753	2.00644	2.29217	1.07693	0.809079	0.99736	1.67516	1.20625	1.18912	1.10712	1.54767	0.974043	1.3672	2.2728	6.62591	0.812157	2.02589	1.88033
2019-08-15 07:20:00		1.81957	2.05169	2.62267	1.35663	0.811324	1.18593	1.79649	1.18643	1.43616	1.57603	1.82592	1.28714	1.93742	2.15896	7.27271	0.997414	2.11065	2.51031
2019-08-15 09:21:00		0.701692	0.868171	1.58975	1.01926	0.572691	1.01415	0.777431	0.761236	0.682923	0.710476	0.843493	0.598869	0.707334	1.20265	2.78852	0.612205	0.852271	0.88601
2019-08-15 12:22:00		0.723785	0.906683	0.654464	1.59046	0.59129	0.8127	0.68975	0.781523	0.703129	0.746386	0.614646	0.603282	0.643793	0.930323	2.08024	0.709175	0.722192	0.750692
2019-08-15 14:23:00		0.614752	0.755927	1.08188	0.795398	0.657973	0.699034	0.599736	0.780466	0.636288	0.553687	0.719814	0.572025	0.620127	0.899809	1.74992	0.637193	0.623684	0.769928
2019-08-15 16:24:00		0.679515	0.741728	0.696695	0.797557	0.6053	0.645183	0.963863	0.742126	0.674162	0.592815	0.796675	0.591818	0.603132	0.911633	1.79674	0.689967	1.07572	0.767583
2019-08-15 18:25:00		0.674975	0.805354	1.01661	0.788422	0.554106	0.650901	0.815507	0.708775	0.638093	0.565065	0.738278	0.574749	0.602933	0.959536	1.66263	0.612749	0.880422	0.734535
2019-08-15 20:25:00		0.751108	0.846815	0.708307	0.862665	0.577606	4.87615	1.07152	0.670255	0.663109	0.704383	0.76474	0.58441	0.599378	0.949315	2.03326	0.684644	1.21177	0.779528
2019-08-15 23:27:00		0.615917	0.727961	0.61911	0.878677	0.586303	0.580435	0.609338	0.697156	0.616314	0.730583	0.702951	0.582311	0.580406	0.831945	1.9966	0.5809	0.838673	0.737581
2019-08-16 01:27:00		0.600942	0.810863	1.08066	0.91726	0.552078	0.583602	0.661326	0.691405	0.579865	0.817878	0.753566	0.553524	0.599778	1.00592	1.96197	0.580133	0.790094	0.639198
2019-08-16 03:28:00		0.875341	0.928536	0.659788	0.99888	0.60204	0.564728	0.698445	0.694791	0.659987	0.909956	0.942542	0.597859	0.790217	1.0659	2.7395	0.65349	1.51756	0.930644
2019-08-16 05:29:00		0.926797	1.08688	0.819257	0.843929	0.583797	0.581042	0.694722	0.823322	0.729313	6.84146	0.952634	0.658152	0.876024	0.596087	3.14957	0.627416	1.39265	1.0677
2019-08-16 07:30:00		0.840818	0.811676	1.23661	1.15937	0.590069	0.618185	0.640117	0.766777	0.671662	0.775313	0.819034	0.662481	0.817292	0.85476	2.1269	0.620925	0.935749	0.687913
2019-08-16 10:31:00		0.736304	0.768646	0.722994	0.820332	0.570761	0.560465	0.675706	0.707668	0.631251	0.933893	0.824841	0.591588	0.690066	0.90468	1.99419	0.643072	0.71786	0.86909
2019-08-16 12:32:00		0.589031	0.661134	0.651328	0.767525	0.569276	0.699275	0.679422	0.6884	0.590359	1.02429	0.802535	0.57062	0.611035	0.781544	1.47125	0.606196	0	0.592182
2019-08-16 14:33:00		0.56749	0.621521	0.953391	0.814713	0.678146	0.856365	0.714915	0.682948	0.641961	1.30914	0.940075	0.610356	0.650562	0.803612	1.98542	0.782823	0	0.780162
2019-08-16 16:34:00		0.655819	0.719645	1.08301	1.10177	0.680409	0.578219	0.566988	0.714438	0.626997	1.69971	0.68663	0.580709	0.598772	0.826838	1.89755	0.671681	0.666898	0.65966
2019-08-16 18:34:00		0.707861	0.758114	0.963732	1.41812	0.575854	0.648458	0.616268	0.757741	0.675209	0.551978	0	0.594404	0.601957	0.834991	1.83929	0.634595	0.642996	0.714027
2019-08-16 21:36:00		1.14678	0.980528	1.04683	0.943356	0.633977	0.8999	0.745395	0.875346	0.877741	0.750062	0.958358	0.669287	0.671949	0.991105	3.11215	0.62321	0.799514	3.56394
2019-08-16 23:36:00		1.80144	1.38441	1.61749	1.64018	0.720122	0.712262	0.702736	1.14069	1.08381	0.814639	1.29975	0.845335	1.06973	1.36329	4.59165	0.759494	1.75022	1.36522
2019-08-17 01:37:00		1.51781	1.49364	2.68576	1.05694	0.684986	0.727973	1.34184	1.00448	1.03869	0.889755	1.22723	0.822887	0.862134	1.41218	4.757	0.655691	1.55569	1.19124
2019-08-17 03:38:00		2.48679	0.621476	2.38854	1.30693	0.835751	0.922601	2.24198	1.29472	1.26712	1.73785	1.72182	1.06499	1.84575	1.49939	5.75591	0.968533	2.90103	2.17493
2019-08-17 05:39:00		2.9737	0.762314	3.31539	5.62433	1.52256	1.52462	2.32855	1.57045	1.71233	2.47235	2.47782	1.72128	3.47119	2.06365	8.05146	1.33816	2.76318	4.14814
2019-08-17 13:45:00		0.661831	0.780478	0.918763	0.856442	0	0.61898	0.593556	0.691717	0.623267	0.893282	0.777717	0.581057	0.667554	1.06126	1.78637	0.649221	0.600718	0.562683
2019-08-17 15:46:00		0.657067	0.77014	0.703447	0.924809	0.572976	0.625443	0.669874	0.752634	0.647282	0.623882	0.767847	0.577483	0.613434	1.0108	1.64168	0.640387	0.719695	1.15188
2019-08-17 17:47:00		0.714015	0.828564	0.769302	0.767863	0.635175	0.6617	0.61779	0.736651	0.682404	0.614507	0.801276	0.599177	0.634517	1.03625	1.87198	0.694805	0.935942	0.579711
2019-08-17 19:48:00		1.03998	1.09186	1.58183	1.82627	0.656164	0.647152	0.690732	0.830665	0.828171	1.20858	1.01107	0.669258	0.686384	1.14323	2.556	0.659852	0.732153	1.08334
2019-08-17 21:49:00		0.697528	1.29636	1.30253	0.752953	0	0.795233	0.717017	0.738945	0.659965	0.624894	0	0.590154	0.602767	1.30829	2.04006	0	0.780693	0.697866
2019-08-18 00:50:00		0.784533	1.21781	0.752225	1.20189	0.569916	0.588022	1.17821	0.72784	0.66903	1.0038	0.754281	0.598956	0.619615	1.38209	2.53481	0.636336	1.34967	0.797825
2019-08-18 02:51:00		1.09206	0.697513	0.895771	0.998914	0.651777	0.590635	1.36042	0.860588	0.781152	0.775034	0.904696	0.676174	0.692966	1.49378	3.38891	0.627911	1.51202	0.905203
2019-08-18 04:52:00		1.25819	1.21569	1.34621	1.00657	0.686838	0.566754	1.58682	0.92812	0.82383	0.992536	1.00001	0.729835	0.808962	1.53145	3.75709	0	1.84588	1.10701
2019-08-18 06:53:00		1.44133	1.4618	2.18942	1.26413	0.711449	1.03508	1.66767	0.99104	0.959852	0.746386	0.975033	0.846977	1.1131	1.67472	4.54223	0.7676	2.02531	1.36368
2019-08-18 08:53:00		0.862772	1.31149	0.542105	1.14171	0.622319	1.02666	0.920213	0.840605	0.72013	0.82577	0.908467	0.645529	0.70175	1.46896	3.161	0.629507	1.00916	0.962713
2019-08-18 11:55:00		0.69199	1.02252	0.825332	0.939124	0.542105	0.591199	0.698023	0.734778	0.648828	0.66248	0.807296	0.584994	0.665267	1.14401	2.31714	0	0.865757	0.829393
2019-08-18 13:55:00		0.714775	0.949948	6.75414	0.940433	0.581709	0.643079	0.704897	0.82718	0.708072	1.36253	0.86201	0.601817	0.602402	0.991266	1.95007	0.64908	0.749879	0.672686
2019-08-18 15:56:00		0.734241	0.917856	0.651593	0.818006	0	0.615354	0.603613	0.648558	0.668875	0.548986	0.741149	0.582591	0.608763	1.22893	1.50474	0.676107	0.97836	0.64731
2019-08-18 17:57:00		0.786663	0.871498	0.772644	0.695556	0.621147	0.637308	0.686379	0.652216	0.712815	0.592556	0.826366	0.618869	0.645353	0.978348	1.99487	0.639373	0.707523	0.78638
2019-08-18 19:58:00		1.16554	1.3541	0.969894	0	0.667306	0.663354	0.686021	0.914086	0.898318	0.741908	0.986416	0.656121	0.664931	1.14186	2.64678	0	0.775973	1.02693

## Sheet: Farm Time Series
		ng m-3
TIME (D/M/Y HH:MM:SS)		cubebene	copaene	alpha cedrene	betacaryophyllene	beta cedrene	thujopsene	cuparene	calamanene	longifolene	alpha muurolene	gamma cadinene	delta cadinene	amorphene	beta gurjenene	bergamotene	farnesene	gamma cuprenene
2020-04-25 23:21:00		0.582168	0.835198	0	2.3015	0.422754	0.702931	0.409848	1.0945	0.586737	0.990206	0.289845	0.578457	1.35392	0.29859	2.51399	0.349716	0
2020-04-26 01:22:00		0.439023	0.862502	0.2575	0	0.433621	0.829821	0.406202	1.2462	0.589415	0.614504	0.335443	0.607084	1.29626	0.305395	2.72929	0.557342	0.557672
2020-04-26 03:23:00		0.48984	0.762918	0	0	0	0	0.369601	0	0	0.574087	0.338763	0	0.876555	0	0	0.500774	0
2020-04-26 06:24:00		0	0.773448	0.355333	1.13088	0.28434	0.838103	0.429492	0.275187	0	0.708742	0.339322	0.638167	0.989853	0.364278	0.338916	0.596897	0.434748
2020-04-26 10:26:00		0.503343	0.749115	2.88252	0.574559	0.455295	0	0.407257	1.25755	0	0	0.270085	0.717632	0.89144	0.335644	0.504573	0.269195	0.503827
2020-04-26 13:27:00		0	0.879224	0.325425	0.38964	0.348895	0	0.320725	0.566705	0.454459	0	0	0.512999	1.82802	0.314189	2.43901	0.279343	0.308865
2020-04-26 15:28:00		0	0	0.276135	0.33599	0	0	0	0	0	0.674019	0	0.321457	0	0.274837	0.283629	0.27272	0.288336
2020-04-26 17:29:00		0	0.639656	0.665534	0.3788	0	0.552125	0	0.391688	0.581417	0	0.282494	0.614734	1.1843	0.363086	0	0.285277	0
2020-04-26 20:30:00		0.424378	0.75725	1.11255	0.583343	0.329171	0.766509	0.429987	1.01564	0.538721	1.18124	0	0.643076	1.05602	0.515059	0.393221	0.331949	0.338025
2020-04-26 22:31:00		0	0.752321	0.382397	0.755247	0.332663	0.635067	0.470735	0.300139	0.517051	1.15469	0	0.61875	1.16258	0.436411	0.28803	0.307702	0.422014
2020-04-27 00:32:00		0.502979	0.722246	0.281999	0.509552	0.333495	0.672065	0.526407	0.358853	0.765283	0.741782	0.296605	0.660912	1.30778	0.48325	0	0.841277	0.439706
2020-04-27 03:33:00		0.583067	0.658556	0.34883	0.319504	0.354638	0.659801	0.553871	0.30321	0.831869	0.734525	0.305424	0.663787	1.45258	0.41245	0.445632	0	0
2020-04-27 05:33:00		0.545718	0.554741	1.63498	0.527162	0.456629	0.704276	0.492469	0.89949	0.323368	1.35715	0.293915	0.563648	1.00993	0.377873	0.682777	0.292321	0.516797
2020-04-27 07:34:00		0.469244	0.577406	1.39947	0.545476	0.440888	0.742484	0.475768	0.788034	0.531947	0.542105	0.310619	0.519498	1.0378	0.364595	0.462503	0.298062	0.430543
2020-04-27 10:36:00		0	0.721787	0	0.317123	0.340747	0.692837	0.42099	0.359035	0.392138	0.678804	0	0.511146	0.890205	0.341605	0.460619	0.309138	0.464307
2020-04-27 12:36:00		0	0.708493	0.957613	0.437249	0.350925	0.596312	0.434866	0.484945	0.396748	0.807226	0.302886	0.511287	0.885513	0.341688	0.47373	0.30128	0.301912
2020-04-27 14:37:00		0	0.712747	0.927326	0.522825	0.360768	0.546587	0.408593	0.484073	0.417734	0.82187	0.307335	0.543411	0.888017	0.32278	0.426964	0.321037	0
2020-04-27 17:38:00		0	0.719852	0.304315	0.411182	0.356066	0.6117	0.46521	0.513116	0.435821	0.830756	0	0.613602	0.888766	0.345801	0.406626	0.321568	0
2020-04-27 19:39:00		0.935876	0.558952	1.23228	0.504693	0.347532	0.571675	0.487177	0.544636	0.369121	1.3015	0	0.549393	0.820495	0.349411	0.458578	0.3299	0
2020-04-27 21:40:00		0.788358	0.947569	1.30873	1.47722	0.369132	0.8157	0.598087	1.64519	0.982566	1.31389	0.348169	0.659364	1.63358	0.525734	0.468972	0.367976	0.623969
2020-04-28 00:41:00		0.840693	0.649121	2.34568	3.03893	0.507063	0.799	0.858831	2.55916	1.31072	1.19824	0.412248	0.607341	1.73593	0.498535	0.536249	0.572692	0.655853
2020-04-28 02:42:00		0.576111	0.826417	5.9368	2.42043	0.709704	0.988114	1.14766	3.00199	1.00464	1.56726	0.512094	0.518127	1.41409	0.402406	0.617257	0.949318	0.626483
2020-04-28 04:43:00		0.849197	0.940957	4.9931	1.94414	0.64606	0.932224	1.04805	3.09322	1.10122	1.16252	0.452497	0.631809	1.45778	0.46804	0.777013	0.842273	0.721754
2020-04-28 07:44:00		0.722043	1.34597	5.03765	2.56274	0.650085	0.957033	1.07913	3.43086	1.8163	1.5367	0.50739	0.72724	2.31051	0.527773	0.540836	0.909667	0.53722
2020-04-28 09:45:00		0.552513	0.827857	1.89006	1.80047	0.384624	0.700565	0.711623	2.30585	1.47266	1.81195	0.435404	0.754175	4.03632	0.531632	0.81537	0.724134	0.436472
2020-04-28 11:46:00		0.987155	0.838581	1.11613	0.798708	0.450102	0.691429	0.598499	1.11788	1.24718	1.59279	0	0.674809	4.04949	0.429826	0.778417	0.354461	0.387392
2020-04-28 14:47:00		0.78503	0.821179	0.582173	0.410833	0.378473	0.632701	0.504407	0.640757	1.00869	1.09243	0	0.639042	2.37203	0.427095	0.602788	0.363252	0.368213
2020-04-28 16:48:00		0.818518	0.726543	0.42198	0.415619	0	0.623933	0.662934	0.569982	0.746692	0.839148	0.352836	0.60508	1.1819	0.399184	0.473989	0.339678	0.347001
2020-04-28 18:48:00		0.345792	0.54558	0.80242	0.797434	0	0.596917	0.461418	0.644692	0.578653	0.57538	0.350332	0.666263	1.03663	0.403327	0.361854	0.40163	0
2020-04-28 21:50:00		0.586756	0.547963	0.954874	0.905681	0	0.664005	0.740518	0.348802	1.0448	0.85383	0.347015	0.73863	1.95407	0.466641	0.63833	0	0.364251
2020-04-28 23:50:00		1.17722	1.16316	4.27712	2.42346	0	0.787644	1.21612	2.68787	1.66895	1.57803	0.388206	0.911651	3.29842	0.539014	0.764152	0	0.50294
2020-04-29 01:51:00		2.08119	0.560083	2.83683	4.5314	0.367371	0.918982	0.702268	4.08569	3.55084	1.136	0.434372	1.24183	7.65213	0.531448	1.02595	0	0.52191
2020-04-29 04:52:00		1.21343	0.811139	5.43916	4.1308	0.711623	0.842091	1.33022	4.31633	2.65785	0.821781	0.63639	0.905753	4.65583	0.632817	1.38026	0.428241	0.723562
2020-04-29 06:53:00		1.06058	0.881993	6.59481	4.37448	0.939516	1.0318	1.66473	5.13433	1.16811	0.635709	1.0488	1.08771	2.81904	0.607822	1.79855	0.892998	1.27459
2020-04-29 08:54:00		1.72491	0.817681	4.54216	3.19871	0.42907	0.768139	1.03891	3.47342	2.1586	0.839483	0.414987	1.36967	6.39588	0.492296	1.06616	0	0.620123
2020-04-29 11:55:00		1.41087	0.543839	0.794304	0.557197	0	0.58136	0.648733	0.76815	1.23015	0.942859	0	0.721168	1.79801	0.486536	0.684915	0	0
2020-04-29 13:56:00		0.723705	0.545014	0	0	0	0	0.45382	0.682896	0.446049	0.964237	0	0.744293	1.14486	0.465344	0.890914	0	0
2020-04-29 18:58:00		0.453565	0.551833	0.386743	0	0	0.571322	0.531341	0.744362	0.90014	1.09717	0.381231	0.853591	1.1564	0.48802	1.1735	0	0.389634
2020-04-29 20:59:00		0.605807	0.54783	3.23784	0.641229	0.406334	0.547123	0.575715	1.10025	1.12235	1.45754	0	0.896606	1.66596	0.444328	0.575705	0.576584	0.443966
2020-04-29 23:59:00		0	0.564042	0.940663	0.90798	0.427867	0	0.398089	0	0.967067	1.83322	0	0.878904	1.72196	0.401866	0.408096	0	0.42682
2020-04-30 04:02:00		0	0.566725	0	0	0	0	0	0.390532	0	0.620322	0	0.41069	0	0.390314	0	0	0
2020-04-30 06:02:00		0.687648	0.542105	0.673981	0.960867	0.430785	0.589406	0	0.948448	0.746838	1.4685	0	0.898212	1.35889	0.44721	0.644521	0.495954	0.415398
2020-04-30 08:03:00		0.621066	0.731297	0.44562	0.921598	0.436689	0.565257	0.422604	0.96942	0.825953	1.43233	0	0.842776	1.28372	0.464881	0.507705	0.444662	0.447163
2020-04-30 11:04:00		0.628903	0.676262	0.956993	0.716876	0.467363	0.556386	0.475255	1.27838	0.593139	1.31765	0	1.12806	1.05862	0.49172	0.542701	0.734652	0.662009
2020-04-30 13:05:00		0.519002	0.763889	1.14959	0.546975	0.443288	0	0.534485	1.27937	0.596578	1.05812	0	1.03391	0.841487	0.43468	0.561604	0.410349	0
2020-04-30 15:06:00		0.519486	0.688985	0.861869	0	0.454332	0.571592	0.530814	1.05523	0.626299	0.936198	0	0.95124	0.763321	0.459335	0.470121	0	0.505071
2020-04-30 21:07:00		0.660497	0.689489	0.654248	0.604862	0.466453	0.566195	0.561753	1.26971	0.844055	1.64838	0	1.09213	1.02343	0.486463	0.603391	0	0
2020-04-30 22:09:00		1.02407	0.611487	1.18674	0.677962	0	0.610171	0.44949	1.60487	0.94555	1.49947	0.431309	1.49173	0.683133	0.481474	0.728358	0.418276	0.446945
2020-05-01 00:10:00		0	0.572639	0.425236	0.463225	0.425267	0	0	0.43585	0	0.569811	0.426507	0	0	0	0	0	0.429491
2020-05-01 03:11:00		0.924415	0.679198	0.980268	0.838064	0.468378	0.857025	0.558188	1.82423	1.59983	2.03375	0.438034	1.27359	2.04021	0.532614	0.929906	0.447336	0.539516
2020-05-01 05:12:00		0.998216	0.639778	1.51354	0.861607	0.47005	0.700695	0.626343	1.97617	1.28742	1.96982	0.456735	1.04917	2.06224	0.584174	0.755497	0.49079	0.628064
2020-05-01 07:12:00		0	0.579234	0	0	0.442067	0	0	0.460509	0.443756	0.553311	0	0	0.557447	0.43841	0	0	0.439266
2020-05-01 10:13:00		0.753848	0.628303	1.79278	0.949022	0.489281	0.649821	0.615423	1.87748	0.816091	1.33487	0.466119	0.970768	1.57332	0.529504	0.569428	0.771745	0.589947
2020-05-01 12:14:00		0.677145	0.644758	0.53143	0.700647	0.469527	0.604166	0.608056	1.08722	0.706676	0.991997	0.456975	0.792722	1.22656	0.479892	0.579877	0.475023	0.460596
2020-05-01 15:15:00		0	0	0.489283	0	0	0	0.480235	0.45086	0.463421	0.604461	0	0	0	0.454759	0	0	0
2020-05-01 17:16:00		0.956636	0.692586	0.998416	0.549167	0.467212	0.547776	0.559917	0.734489	0.691992	0.958064	0	0.853917	0.794448	0.491757	0.595806	0	0.489208
2020-05-01 20:17:00		0.589965	0.551964	0.826141	0.497514	0.48706	0.575872	0.676882	0.723322	0.659671	0.772152	0.457484	0.697931	0.938272	0.508432	0.716396	0	0.484842
2020-05-01 22:18:00		0.553715	0.548461	0.842863	0.966797	0.494623	0.544032	0.661424	0	0.714548	0.891371	0.46262	0.730934	0.932891	0.586706	0.732858	0.495054	0.535473
2020-05-02 00:19:00		0.729744	0.656478	1.1358	0.804072	0.500542	0.609286	0.606683	0.898012	0.795961	1.01559	0.478881	0.703551	0.98072	0.599202	0.574348	0.498542	0.553432
2020-05-02 02:20:00		0.909723	0.689196	3.36163	1.32758	0.584967	0.745642	0.767512	1.34387	0.849553	1.27034	0	0.719247	1.36062	0.656609	0.601134	0.515643	0.620019
2020-05-02 05:21:00		0.946027	0.66664	3.65763	1.6556	0.750477	0.751572	0.812791	2.05955	1.02888	1.51992	0.510688	0.812819	1.27498	0.659101	0.520739	0.658055	0.769514
2020-05-02 07:22:00		0.757628	0.760712	2.64055	2.01858	0.623111	0.692634	0.792534	1.93144	0.910923	1.15755	0.519351	0.756235	1.17005	0.607546	0.513734	0.524606	0.847023
2020-05-02 09:23:00		0.762913	0.833536	4.19312	2.65604	0.732909	0.990378	0.954786	3.00815	1.68593	1.60278	0.86439	0.86216	1.24373	0.627401	0.909166	0.765719	0.887627
2020-05-02 12:24:00		0.542236	0.605986	0.810773	0.656226	0.517066	0.571647	0.579504	0.73067	0.784938	0.835398	0	0.715139	0.963577	0.62363	0.612996	0	0.49148
2020-05-02 14:25:00		0.527534	0.573216	0.552867	0.500675	0	0.559099	0.718668	0.674703	0.647795	0.7395	0	0.70315	0.712962	0.587291	0.63784	0	0.512361
2020-05-02 17:26:00		0.617751	0	0.554733	0.539434	0	0.585991	0.605739	0.709261	0	0.759697	0	0.707876	0.693384	0.613605	0	0	0
2020-05-02 19:27:00		0.605154	0.547389	0.563442	0	0	0.587704	0.515339	0.673554	0.574369	0.700978	0.51712	0.787722	0.866022	0.559798	0	0	0
2020-05-02 21:28:00		0.726259	0.659782	4.45473	0.540507	0	0.622875	0	0.703445	0.817728	0.783436	0	0.788502	0.874444	0	0	0	0.703257
2020-05-02 23:28:00		0.556914	0.6576	1.62532	1.04602	0.558276	0.598995	0.83409	1.09877	1.06096	0.999266	0	0.88221	1.04886	0.566204	0.691165	0.631584	0.605775
2020-05-03 02:29:00		0.828494	0.765486	1.7977	1.67231	0.543109	0.670793	0.820667	1.5496	1.48619	1.54982	0.56493	0.913662	1.54791	0.667104	0.661908	0.566207	0.563153
2020-05-03 04:30:00		1.141	0.847659	1.90402	2.50567	0.552225	0.636707	0.783221	2.033	1.63251	2.02827	0	1.06155	2.3317	0.653966	0.63366	0.563964	0.581103
2020-05-03 07:31:00		1.28794	0.960693	2.08067	1.8937	0.560701	0.699394	0.849231	2.0358	1.82884	2.55653	0	1.11336	2.93348	0.751894	1.18348	0	0.622192
2020-05-03 09:32:00		1.17242	0.779334	1.98899	1.46712	0.541758	0.643202	0.822326	1.20417	1.8197	2.65214	0	0.909974	3.93592	0.718385	0.863442	0	0.637253
2020-05-03 13:34:00		0.695192	0.548393	0.730486	0.652189	0	0.66233	0.640038	0.874746	1.23545	1.56361	0	0.805466	2.47452	0.672518	0.848703	0	0.593331
2020-05-03 16:35:00		0.640696	0.545538	0.563062	0	0	0.592316	0.554875	0.670897	0.743048	0.897861	0	0.860138	0.542105	0.591011	0	0	0
2020-05-03 18:36:00		0.59063	0.722459	0	0	0	0.608551	0.62532	0.706825	0.570366	0.775968	0	0.852736	0	0.690456	0	0	0
2020-05-03 20:37:00		0.629089	0.636001	0.570075	0	0	0.623256	0.563763	0.760267	0.709013	0.819973	0	0.853988	0	0.659075	0	0	0
2020-05-03 23:38:00		0.659728	0.548973	1.67724	0.798086	0.580364	0.693238	0.60672	0	1.11028	1.46537	0	1.19794	1.54554	0.702493	0	0.709099	0.610648
2020-05-04 01:39:00		0	0.751044	0.670934	0.775229	0.590173	0.648282	0.751804	1.44717	1.2166	1.51934	0	1.08568	1.7468	0.79033	0	0.699461	0
2020-05-04 03:40:00		0.972421	0.853633	1.20659	0.942986	0.598913	0.59495	0.741619	1.39407	1.28782	1.91719	0	1.19264	2.28155	0.85064	0	0.721904	1.70889
2020-05-04 06:41:00		1.0393	0.656063	2.48549	1.02934	0.730855	0.604068	0.794794	1.41844	1.23287	2.1872	0	1.17518	2.2829	0.837872	0.854202	0.649065	1.48439
2020-05-04 08:42:00		1.10829	0.629151	2.10696	1.07817	0.822409	0.589957	0.736436	1.50731	1.24935	2.0426	0	1.26515	2.02028	0.780616	0.781595	0.607857	0.646915
2020-05-04 10:42:00		0.86878	0.689029	0.973242	0.762024	0.640852	0.60432	0.669759	1.13654	1.04673	1.31912	0	1.06152	1.39346	0.711257	0.727187	0.598067	0.713488
2020-05-04 13:43:00		0.687562	0.542647	0.615409	0.67446	0	0.564404	0.643398	0.723294	0.787529	0.734956	0	0.862168	0.79653	0.667236	0	0	0.605681
2020-05-04 19:20:00		0.606668	0	0	0.762667	0	0.552877	0.633243	0.785055	0.878597	0.654593	0	0.874691	0.550331	0.677019	0.671329	0	0
2020-05-04 21:21:00		0	0.542693	0	0.617014	0.617068	0	0	0.614305	0	0.574291	0	0.697375	0	0.614873	0.624042	0	0
2020-05-04 22:22:00		0.661272	0.654305	0	0	0.700879	0.56082	0.826244	0.982458	0.752254	0.706008	0	0.878495	0.93353	0.657259	0.765676	0.6256	0.637753
2020-05-05 00:22:00		0.698261	0.602465	1.50971	1.13778	0.630531	0.554725	0.896809	1.06397	0.819054	0.80835	0	0.885891	0.897903	0.691155	0.839739	0.658023	0.935673
2020-05-05 02:23:00		1.13664	0.55269	2.04524	1.17389	0.650643	0.612806	0.928124	1.17441	0.949336	1.03671	0	0.838967	1.07097	0.68462	0.826563	0.686079	0.640147
2020-05-05 05:24:00		1.52377	0.62117	4.59584	0.957116	0.807424	0.77562	1.11783	1.69776	1.08891	1.29771	0.713456	0.949971	1.4235	0.734188	0.640658	0.645733	0.830156
2020-05-05 07:25:00		1.12705	0.56015	2.02265	1.36776	0.696169	0.62802	0.818312	0.96011	1.08374	1.06991	0	0.870396	1.25278	0.676019	0.728279	0.653425	0.660193
2020-05-05 09:26:00		1.04009	0.631962	2.40588	1.45716	0.744679	0.67084	0.9152	1.23644	1.17845	1.17826	0.67389	0.893395	1.45375	0.683228	0.753406	0	0
2020-05-05 10:27:00		0.995667	0.595231	1.91905	1.2151	0.677397	0.585428	0.805451	0.882346	1.0937	0.927681	0	0.857978	1.04838	0.686251	0.740947	0.654677	1.36941
2020-05-05 12:27:00		0.860863	0.543944	1.89647	0.97171	0.698533	0	0.816478	0.772772	1.01782	1.02441	0	0.924937	1.33435	0.7386	0.891742	0	0.977615
2020-05-05 14:28:00		1.03834	0.545549	1.76728	0.780186	0	0	0.771993	0.871413	0.959891	0.836596	0	0.885525	1.03831	0.736257	0.860202	0	0
2020-05-05 17:29:00		0.901767	0.582115	2.37343	1.06927	0	0.654934	0.775666	0.869611	1.00249	0.788176	0	0.90316	0.838632	0.709906	0.983117	0	0.675533
2020-05-05 19:30:00		0.957541	0.652455	3.10408	1.15284	0.695286	0.642489	0.829723	1.00967	1.08191	0.772342	0	0.955023	1.00013	0.722215	1.05662	0	1.05414
2020-05-05 21:31:00		0.961914	0.647175	2.73448	0.981875	0.771663	0.667204	0.827354	1.12769	1.30628	1.00921	0	0.98733	1.23253	0.709046	1.18139	0.717679	0
2020-05-06 00:32:00		1.12428	0.583807	2.53192	1.37472	0.846341	0.649391	0.828016	0.928979	1.66008	1.4956	0	1.02436	1.71201	0.800083	0.951995	0.772007	1.01954
2020-05-06 02:33:00		1.09506	0.545259	2.72313	1.33456	0.824586	0.607673	0.823737	1.28237	1.20941	1.19614	0.712724	1.10392	1.36146	0.815767	0.916737	0.717768	0.789985
2020-05-06 04:34:00		1.10453	0.551536	2.71249	1.14971	0.825465	0.627472	0.830317	1.29642	1.0464	1.06318	0.717375	1.11861	1.34116	0.802321	0.943706	0.760486	0
2020-05-06 07:35:00		1.14921	0.622243	1.60755	1.09938	0.801598	0.617307	0.801085	1.20076	1.50854	1.18449	0	1.07624	1.21918	0.823394	0.948167	0.744543	1.11372
2020-05-06 09:36:00		0.896186	0.580997	1.12915	1.02936	0.748867	0.598335	0.771372	0.953027	1.35185	1.08448	0	1.01133	1.14041	0.844193	1.03879	0	0.918022
2020-05-06 11:36:00		1.01623	0.54371	1.01218	0.816116	0.754572	0.557843	0.747638	0.85811	1.20638	0.952481	0.738331	0.951365	0.94546	0.829032	1.02563	0	0.759092
2020-05-06 14:38:00		0.787113	0.550128	0.786757	0.764744	0	0	0.756186	0.850439	1.09287	0.67699	0	0.946418	0.699495	0.75484	0.81932	0	0
2020-05-06 16:39:00		0.816399	0.585342	0.984837	0.770803	0	0	0.80024	0.836606	0.887136	0.650119	0	0.937683	0.620046	0.761737	0.861284	0	0.769085
2020-05-06 18:39:00		0.790926	0.589206	1.06094	0	0	0.578013	0.83194	0.880879	0.866812	0.606197	0.765413	0.908107	0.645391	0.79713	0	0	0
2020-05-06 21:41:00		1.00408	0.542105	1.15824	1.04113	0.801857	0.564378	0.866972	0.957097	0.94094	0.666689	0.773141	0.941709	0	0.808867	0.823145	0.788871	0
2020-05-06 23:41:00		0.955381	0.597301	1.02152	1.55858	0.79869	0.568685	0.85809	0.916644	1.02712	0.737176	0.803969	0.884166	0.735118	0.834231	0.834803	0.843533	0.969646
2020-05-07 01:42:00		0.98181	0.601409	1.17425	1.15554	0.797198	0.582929	0.866459	0.965521	1.14725	0.899934	0.845364	0.918721	0.847723	0.873575	0.820145	0.82421	0.790757
2020-05-07 04:44:00		1.01271	0.61701	1.16773	1.30304	0.836873	0.601764	0.898696	0.987822	1.06697	0.774659	0.790213	0.958945	0.8666	0.833813	0.814575	0.834985	0.819368
2020-05-07 06:44:00		1.05052	0.608725	0.802835	1.39628	0.871879	0.607305	0.956174	1.27887	1.26847	0.890194	0.804827	0.864675	0.961333	0.876291	0.829763	0.908401	0.943442
2020-05-07 08:45:00		0.988079	0.610627	1.65216	1.2234	0.839759	0.596905	0.933493	0.944249	1.25272	0.870581	0.81185	0.909056	0.988686	0.867485	0.894309	0.822762	1.26164
2020-05-07 11:46:00		0.891459	0.571874	0	0.910592	0	0.557621	0.868981	0.867419	0.960342	0.650319	0	0.940472	1.00306	0.874334	0	0	0
2020-05-07 13:47:00		0.880938	0.543885	0.857135	0	0	0.556016	0.852	0.894731	0.920479	0.619333	0	1.04727	1.1904	0.856944	1.44741	0	0
2020-05-07 15:48:00		0.838276	0.554271	0	0	0	0.548599	0.858904	0.892592	0.914455	0	0	0.920785	0	0.919496	0	0	0
2020-05-07 18:49:00		0.86921	0.590199	0.893907	0.89117	0	0.557495	0.843172	0.915354	0.900539	0.615225	0	1.02042	0.58574	0.940927	0.878762	0	0
2020-05-07 20:50:00		1.50363	0.598401	1.02357	1.09713	0.863841	0.560866	0.939126	1.05423	1.04786	0.674558	0	1.0427	0.692402	0.904557	0	0.856978	0.900861
2020-05-07 22:50:00		1.24295	0.549452	1.34994	2.05566	0.883994	0.622417	0.993002	1.1369	1.31717	0.904511	0	1.02696	0.869251	0.94059	0.929329	0.896008	1.11641
2020-05-08 01:52:00		1.33903	0.600556	1.48344	1.90562	0.920515	0.624717	1.10393	1.58991	1.78804	1.16516	0	1.16146	1.21964	0.928534	1.13724	0.928889	1.2483
2020-05-08 03:53:00		1.27057	0.596008	1.52233	1.83405	0.914375	0.621014	1.06429	1.54437	1.73338	1.19155	0	1.08888	1.34606	0.961577	0	0.917802	0.886907
2020-05-08 05:53:00		1.32611	0.614125	1.14957	2.00863	0.919698	0.632656	1.07376	1.62229	1.69557	1.30215	0	1.17464	1.46411	1.02227	0.919091	0	1.26594
2020-05-08 08:55:00		1.16488	0.613053	1.26578	1.17689	0.910147	0.555683	0.997433	1.11708	1.39557	1.02144	0	1.09027	1.22612	1.15416	0.994212	0	1.29396
2020-05-08 10:56:00		1.00876	0.553426	0.941097	1.09685	0	0.555737	0.968267	0.925737	1.05133	0.703963	0	1.0719	0.782515	0.934108	1.47447	0	0
2020-05-08 12:56:00		0.918774	0.544288	0	0	0	0.565821	0.962383	1.01929	0.946629	0.632397	0	1.02238	0.842105	0.95307	1.18911	0	0
2020-05-08 15:58:00		0.990953	0.550918	0.979793	0.975775	0	0.55001	0.980856	1.00049	1.10338	0.64118	0	1.13903	0.663544	0.96562	1.24092	0	1.07214
2020-05-08 17:58:00		1.04011	0.545153	1.3689	1.14254	0.944189	0.569543	0.967365	1.07084	1.21418	0.700091	0	1.105	0.831957	1.01513	1.57799	0	1.49375
2020-05-08 19:59:00		1.00475	0.547071	1.47171	1.07509	0.978061	0.641223	1.00744	1.12274	1.26811	0.829623	0	1.37591	1.06973	1.04989	1.47711	0.965318	1.4151
2020-05-09 02:01:00		1.09708	0.572168	1.36554	1.98165	1.00422	0.560192	0	1.15978	1.26807	0.69564	0.955384	1.05792	0.748064	1.01301	1.08186	0.991191	1.00695
2020-05-09 04:01:00		1.08345	0.57691	1.24767	1.26377	0.999218	0.554707	0	1.06116	1.21149	0.605156	0.970813	1.07151	0.62522	1.14444	1.00567	1.02773	0
2020-05-09 07:03:00		1.01363	0.576116	1.43318	1.36001	1.02366	0.553992	0	1.10345	1.18712	0.638958	0	1.08171	0.649836	0.994579	0	0.984824	1.1704
2020-05-09 09:04:00		1.03477	0.573875	1.49645	1.38506	1.0067	0.551121	0	1.22715	1.37162	0.639806	0	1.13303	0.70001	1.0359	1.06944	1.00397	1.0867
2020-05-09 11:03:00		1.03129	0.57491	1.17888	0	1.02019	0.556082	0	1.03845	1.10612	0.581804	0	1.08738	0.604796	0.999043	0	0	1.00679
2020-05-09 14:06:00		1.14037	0.588156	1.4284	1.02496	1.02708	0.545301	0	1.04675	1.05413	0.576828	0	1.15971	0.574166	1.04506	1.07093	0	0
2020-05-09 16:07:00		1.05016	0.597624	1.16852	0	0	0.54773	0	1.06009	1.07114	0.568061	0	1.17279	0.937492	1.06084	0	0	0
2020-05-09 18:06:00		1.11333	0.572747	1.27307	1.11475	1.06238	0.548323	1.10264	1.07694	1.29768	0.596253	0	1.16797	0.76322	1.05009	1.13505	0	0
2020-05-09 21:09:00		1.08358	0.59921	1.64992	4.60574	1.08737	0.558825	1.14072	1.10313	1.06504	0.570385	0	1.19433	0.577522	1.12891	0	0	0
2020-05-09 23:10:00		1.12921	0.585105	2.58043	1.74671	1.16033	0.639113	1.51529	1.29727	1.46132	0.649715	0	1.19428	0.600714	1.07956	1.10662	1.08875	1.1058
2020-05-10 01:09:00		1.25007	0.587241	21.9254	2.51213	1.82044	1.26873	3.74343	1.45652	6.4877	0.582923	0	1.20143	0.718007	1.08589	4.54717	1.09631	1.41078
2020-05-10 04:12:00		1.09297	0.576716	8.8063	2.37476	1.41296	0.680852	3.31408	1.77516	2.29843	0.693589	0	1.26792	0.657557	1.09002	3.09446	1.20174	0
2020-05-10 06:13:00		1.1517	0.665639	4.93815	2.40894	1.30092	0.676418	2.26801	1.92826	1.4669	0.712542	0	1.32106	0.613885	1.11334	3.25586	1.17778	1.09862
2020-05-10 08:12:00		1.19	0.610772	1.84264	2.07508	1.13274	0.638514	1.32214	1.66098	1.59913	0.661522	0	1.25315	0.740723	1.17184	1.11968	1.20163	0
2020-05-10 11:15:00		1.16128	0.583325	1.32626	1.19777	1.08688	0.55679	1.13656	1.192	1.48159	0.658477	0	1.21687	0.730061	1.12748	1.1373	1.084	1.10457
2020-05-10 13:15:00		1.14699	0.555752	0	1.13134	0	0.551638	0	1.11953	1.29131	0.567409	0	1.1975	0.593704	1.21763	0	0	1.83035
2020-05-10 15:15:00		1.17336	0.606171	0	1.21379	0	0.545785	0	1.14355	1.09678	0.57839	0	1.1675	0.716267	1.08628	0	0	1.09879
2020-05-13 06:53:00		0	0	1.1357	1.11209	1.07517	0	0	1.1216	1.24156	0	0	1.08695	0.56537	0	1.19202	0	1.37442
2020-05-13 08:54:00		0	0.57967	3.40329	1.35129	1.16511	0.619177	0	1.3628	1.31593	0.61587	0	1.09673	0	1.09539	1.7233	0	1.31989
2020-05-13 10:54:00		0	0	1.79848	1.27294	0	0.571586	0	1.16406	1.38527	0.566987	0	1.12004	0.618104	0	1.3869	0	1.09638
2020-05-13 14:06:00		0	0.637742	0	1.16878	0	0	0	1.12008	0	0.551408	0	0	0.701761	1.14771	0	0	1.13672
2020-05-13 18:07:00		0	0.653643	2.26999	1.40598	0	0.5662	0	1.4948	1.43966	0.84809	0	0	0.960199	1.23818	1.53717	0	1.18705
2020-05-13 21:08:00		0	0	1.10985	1.17757	0	0.551492	0	1.08968	1.46935	0.656446	0	1.36251	0.635075	1.7925	1.30128	0	1.08202
2020-05-13 23:09:00		0	0.577385	0	1.14909	1.09341	0.549211	0	0	1.80965	0.75914	1.10127	1.34576	0.62139	1.09178	0	0	0
2020-05-14 01:10:00		0	0	0	0	1.07694	0.558363	0	0	1.48717	0.596448	0	1.21346	0.552126	1.1132	1.37294	0	1.13354
2020-05-14 04:11:00		0	0.567039	0	0	1.14684	0.554673	0	0	1.65806	0.69243	1.08123	1.26262	1.05692	1.36646	1.48623	0	1.14561
2020-05-14 06:12:00		0	0.584905	0	0	1.09232	0.604314	0	0	1.47968	0.685296	0	0	0	1.15311	0	0	0
2020-05-14 08:12:00		0	0.567695	0	0	0	0.602933	0	0	2.14472	0.607161	0	1.33087	0.986015	1.14156	1.50109	0	1.11628
2020-05-14 11:14:00		0	0.565605	0	0	0	0.600087	0	0	1.40744	0.626283	0	1.30593	0.920128	1.32287	1.30022	0	0
2020-05-14 13:14:00		0	0.609602	0	0	0	0.581423	0	0	1.37627	0.642788	0	0	0	1.16875	0	0	0
2020-05-14 15:15:00		0	0.651229	0	0	0	0	0	0	1.60729	0	0	0	0	1.18236	0	0	0
2020-05-14 17:50:00		0	0.562419	0	0	0	0.544382	0	0	0	0.570908	0	0	0.574916	1.11865	0	0	1.13147
2020-05-14 19:51:00		0	0.553584	0	0	0	0.554085	0	0	0	0.589317	0	0	0.593175	1.14784	1.1775	0	0
2020-05-14 21:52:00		0	0.570543	0	0	0	0.552131	0	0	0	0.563183	0	0	0	1.11262	0	0	1.12744
2020-05-15 00:53:00		0	0.553634	0	0	0	0.557063	0	0	0	0.629239	1.18786	0	0	1.17575	1.16932	0	1.0979
2020-05-15 02:54:00		0	0.559162	0	0	0	0.557305	0	0	0	0.58185	0	0	0	1.1496	0	0	1.1417

## Sheet: Tower and Farm Mean Diurnal
	Tower Site	alpha copaene	alpha cedrene	beta caryophyllene	beta cedrene	bergamotene	thujopsene	humulene	alloaromadendrene	gamma muurolene	beta selinene	alpha muurolene	gamma cadinene	delta cadinene	cuparene	calammanene	alpha cadinene	azulene	7 epi selinene
Diurnal 2 Hour Period	0	1.25028	2.19112	1.99799	1.57741	0.807342	0.842811	1.29859	0.883865	0.859444	1.08126	1.01141	0.699715	0.786104	1.72048	3.69361	0.656364	1.41602	1.10534
	2	1.81483	2.28429	2.73001	1.85616	0.934942	1.0371	1.45509	1.07244	1.0524	6.38833	1.38901	0.905469	1.45306	1.94028	4.72388	0.805326	1.94249	1.72109
	4	1.70566	2.00712	2.23767	2.20474	0.866372	1.09067	1.35895	1.05631	1.05154	2.10098	1.35662	0.938362	1.43534	1.80015	4.77027	0.846211	1.88837	1.7911
	6	1.70359	2.3266	2.63648	1.99766	0.803398	1.12688	1.50099	1.04764	1.06569	1.01855	1.29249	0.942288	1.43704	1.8471	4.56919	0.827805	1.89936	1.39954
	8	0.886129	1.31058	1.59007	1.22936	0.624797	0.914233	0.870391	0.786044	0.778807	1.97733	0.95273	0.677662	0.850193	1.63606	3.06787	0.663359	0.974302	0.858739
	10	0.671344	0.858436	0.731045	0.865456	0.556433	0.662012	0.742685	0.702668	0.623877	0.815146	0.792225	0.582906	0.645761	1.0627	2.02133	0.643072	0.758847	0.775807
	12	0.651053	0.782617	1.94877	0.99601	0.580758	0.768633	0.666906	0.747205	0.644145	0.961823	0.746687	0.610713	0.631196	0.936206	1.69607	0.68012	0.676566	0.692061
	14	0.699491	0.689563	0.81799	0.820768	0.676506	0.938112	0.737896	0.682127	0.644039	3.28839	0.758269	0.584971	0.612584	1.34026	1.71463	0.851525	1.14391	0.830726
	16	0.663174	0.731995	0.803827	0.889188	0.619694	0.778076	0.836023	0.700045	0.671192	2.34053	0.795525	0.590757	0.614961	0.978623	1.80079	0.764559	0.919208	0.759612
	18	0.810028	0.809234	0.975641	1.16018	0.598317	0.76358	0.819067	0.748017	0.69604	0.772628	0.800761	0.618509	0.608968	0.977112	1.74841	0.65631	0.772188	0.981561
	20	1.01759	1.09902	1.14732	0.994229	0.657143	1.28911	0.943007	0.790088	0.806106	0.84868	0.96578	0.653336	0.670975	1.21399	2.89826	0.667162	1.36702	1.22615
	22	1.347	2.42128	1.77575	1.64719	0.667631	0.969303	1.15786	0.895348	0.902966	1.16614	0.952601	0.726252	0.77266	1.75262	3.64947	0.669105	1.51632	0.912601
	Farm Site	cubebene	copaene	alpha cedrene	betacaryophyllene	beta cedrene	thujopsene	cuparene	calamanene	longifolene	alpha muurolene	gamma cadinene	delta cadinene	amorphene	beta gurjenene	bergamotene	farnesene	gamma cuprenene
Diurnal 2 Hour Period	0	0.774099	0.566572	0.629127	0.262384	0.765687	0.31458	0.608901	0.389774	1.54179	0.455432	1.06122	3.98936	0.823747	0.944684	0.762094	0.962419	0.815227
	2	0.878899	1.4264	0.599709	0.308388	0.889387	0.428589	0.501042	0.535948	2.43178	0.661718	1.23572	3.68422	0.748859	1.11863	0.728062	0.926325	0.916758
	4	0.790287	1.04819	0.709294	0.320949	0.735913	0.289248	0.730449	0.389953	2.3653	0.591474	1.17132	4.54378	0.700335	0.93512	0.654814	1.06801	0.780757
	6	0.811661	1.32325	0.922451	0.359758	0.707963	0.46503	0.778258	0.438005	2.0686	0.578209	1.004	3.70435	0.657268	0.937139	0.737134	0.912228	0.710067
	8	0.972784	0.886781	0.712713	0.404503	0.818653	0.356561	0.753249	0.480976	2.73845	0.712454	1.19788	5.65705	0.817355	1.11602	0.794739	1.03157	0.876815
	10	0.865525	0.588969	0.413047	0.317124	0.737195	0.280727	0.472328	0.370283	1.93497	0.516018	1.18819	3.59982	0.73394	0.853422	0.673957	0.947893	0.817961
	12	0.83842	0.573134	0.439218	0.344198	0.789832	0.32377	0.506906	0.387384	1.56587	0.499397	0.915687	2.69302	0.726944	0.948935	0.534112	0.855607	0.785034
	14	0.857598	0.343406	0.257316	0.0995845	0.758678	0.219732	0.306519	0.289511	1.17064	0.307335	0.967667	2.74979	0.692292	0.903928	0.319003	0.80566	0.796904
	16	0.788735	0.368272	0.265449	0.102797	0.653872	0.259026	0.330045	0.323332	1.28026	0.317665	1.00786	1.5185	0.699539	0.858392	0.315508	0.86985	0.636117
	18	0.860324	0.370023	0.310809	0.0922658	0.633126	0.276053	0.362254	0.321783	1.19292	0.416228	0.992804	1.95133	0.753809	0.952431	0.365765	0.734612	0.892945
	20	0.728268	0.748123	0.334301	0.192734	0.645787	0.276935	0.415992	0.285943	1.35784	0.47952	0.935927	2.20634	0.68074	0.709049	0.425503	0.728509	0.573208
	22	0.843507	0.732168	0.760356	0.270852	0.702022	0.332653	0.519444	0.403519	1.82465	0.469024	1.07109	2.84432	0.707162	0.852551	0.590056	0.888027	0.627628

## Sheet:  Reactivity Calculations
																Reaction Rate constant ( cm3 molec-1 s-1)
															Sesquiterpene ID	Ozone Rate Constant used	SAR ozone rate constant	Experimental ozone rate constant	Hydroxyl Rate Constant Used	SAR hydroxyl rate constant	Experimental hydroxyl rate constant
															cuparene	-	-	-	9.4575e-12	9.4575e-12	-
															calamanene	-	-	-	2.57e-11	2.57039e-11	-
															longifolene	1.14e-17	1.1375e-17	<7E-19	4.7e-11	6.21093e-11	4.7e-11
															beta cedrene	1.2e-17	1.2e-17	-	6.241e-11	6.24123e-11	-
															alloaromadendrene	1.2e-17	1.2e-17	-	6.2484e-11	6.00538e-11	-
															gurjunene	1.2e-17	1.2e-17	-	6.01e-11	6.00538e-11	-
															alpha cedrene	2.78e-17	4.3e-16	2.78e-17	6.7e-11	9.66532e-11	6.7e-11
															alpha copaene	1.58e-16	4.3e-16	1.58e-16	9e-11	1.00353e-10	9e-11
															thujopsene	4.3e-16	4.3e-16	-	9.3012e-11	9.30129e-11	-
															alpha cubenene	4.3e-16	4.3e-16	-	1.0014e-10	1.00146e-10	-
															beta selinene	2.4e-17	2.4e-17	-	1.17184e-10	1.17187e-10	-
															7 epi alpha selinene	4.42e-16	4.42e-16	-	1.5141e-10	1.5141e-10	-
															gamma cadinene	4.42e-16	4.42e-16	-	1.5576e-10	1.55761e-10	-
															gamma muurolene	4.42e-16	4.42e-16	-	1.5576e-10	1.55761e-10	-
															gamma cuprenene	5.0393e-16	5.03937e-16	-	1.79018e-10	1.79019e-10	-
															alpha bergamotene	8.6e-16	8.6e-16	-	1.81727e-10	1.80314e-12	-
															alpha muurolene	1.31725e-15	8.6e-16	-	1.86948e-10	1.89984e-10	-
															amorphene	8.6e-16	8.6e-16		1.89983e-10	1.89984e-10
															alpha cadinene	8.6e-16	8.6e-16		1.89983e-10	1.89984e-10
															beta caryophyllene	1.16e-14	4.42e-16	1.16e-14	2e-10	1.45858e-10	2e-10
															delta cadinene	1.63e-15	1.63e-15		2.10748e-10	2.10749e-10
															azulene	1.795e-17	1.795e-17	-	2.55143e-10	2.55144e-10	-
															humulene	1.17e-14	8.71375e-16	1.17e-14	2.9e-10	2.35187e-10	2.9e-10
															farnesene	1.04e-15	1.04e-15	-	3.19575e-10	3.19576e-10	-
